# Supplementary material
Source: ML conference proceedings conference paper supplement (https://openreview.net/forum?id=P8bnbHuMMv)

$\phi(f) = f^r$ ,  $f = \text{Beale}$ ,  $r = 1.0$ 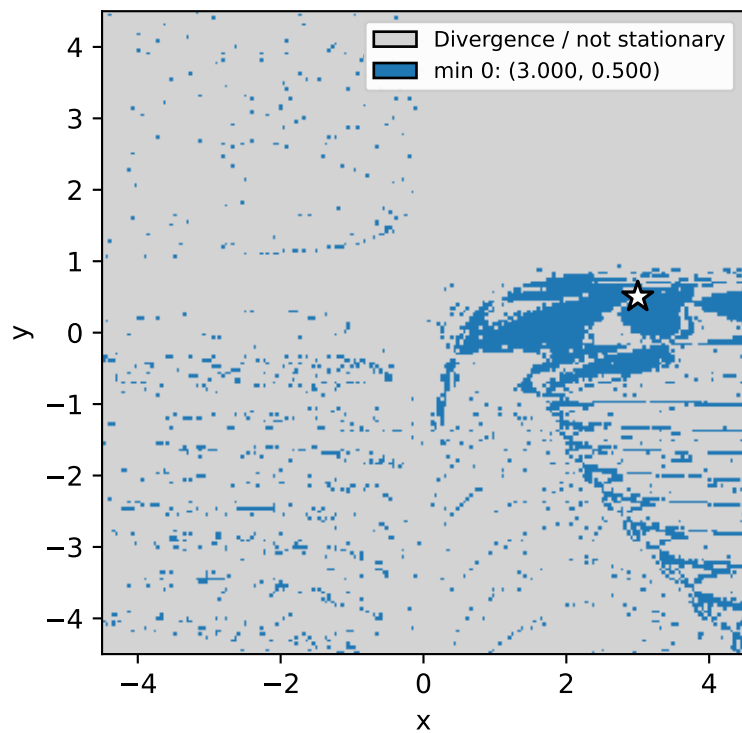 $\phi(f) = f^r$ ,  $f = \text{Beale}$ ,  $r = 2.5$ 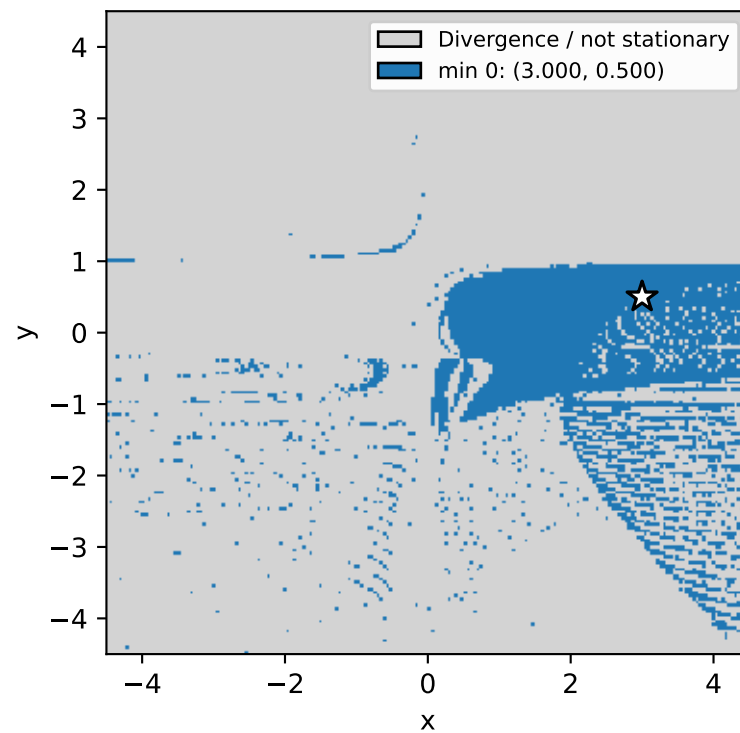 $\phi(f) = f^r$ ,  $f = \text{Beale}$ ,  $r = 0.9$ 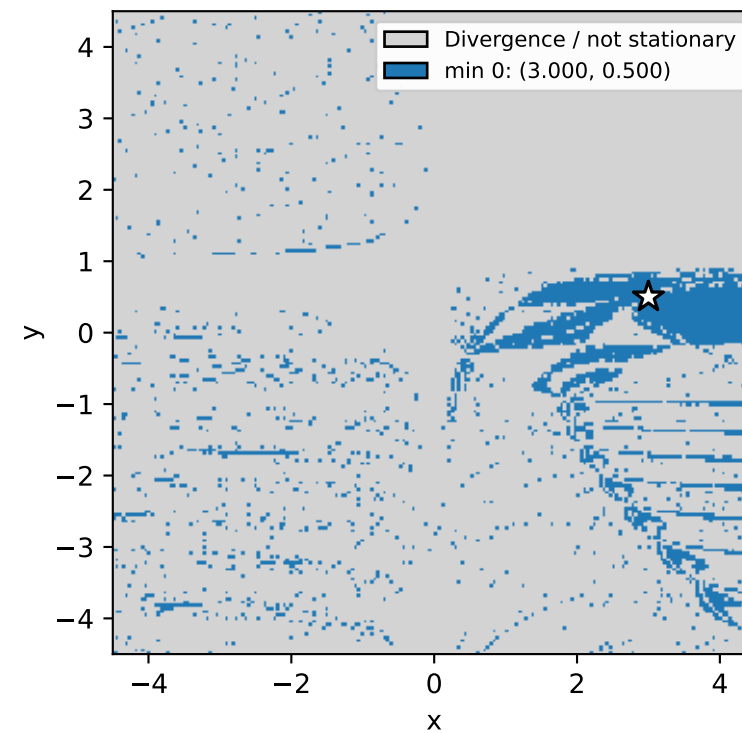 $\phi(f) = f^r$ ,  $f = \text{Goldstein - Price}$ ,  $r = 1.0$ 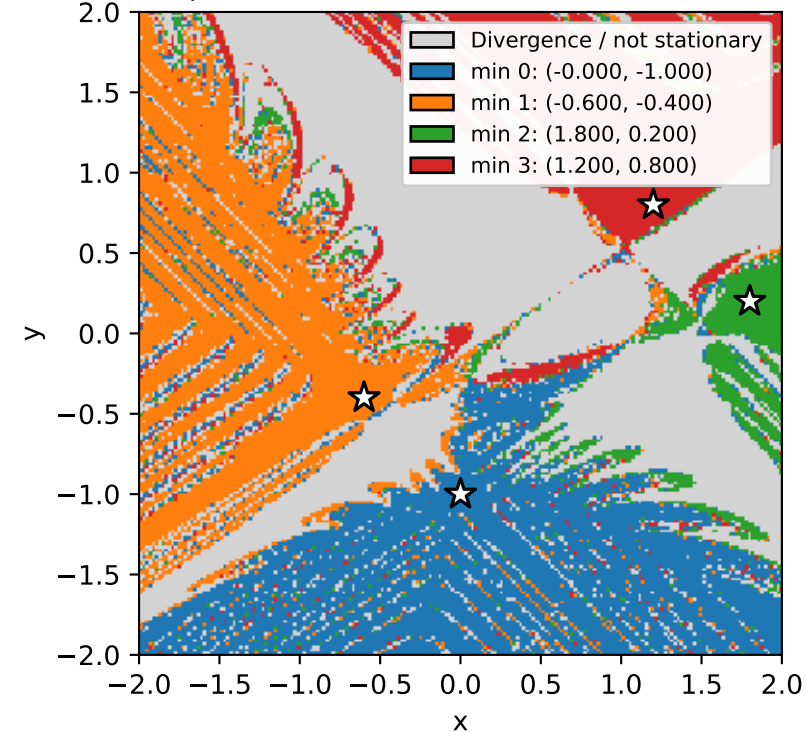 $\phi(f) = f^r$ ,  $f = \text{Goldstein - Price}$ ,  $r = 2.5$ 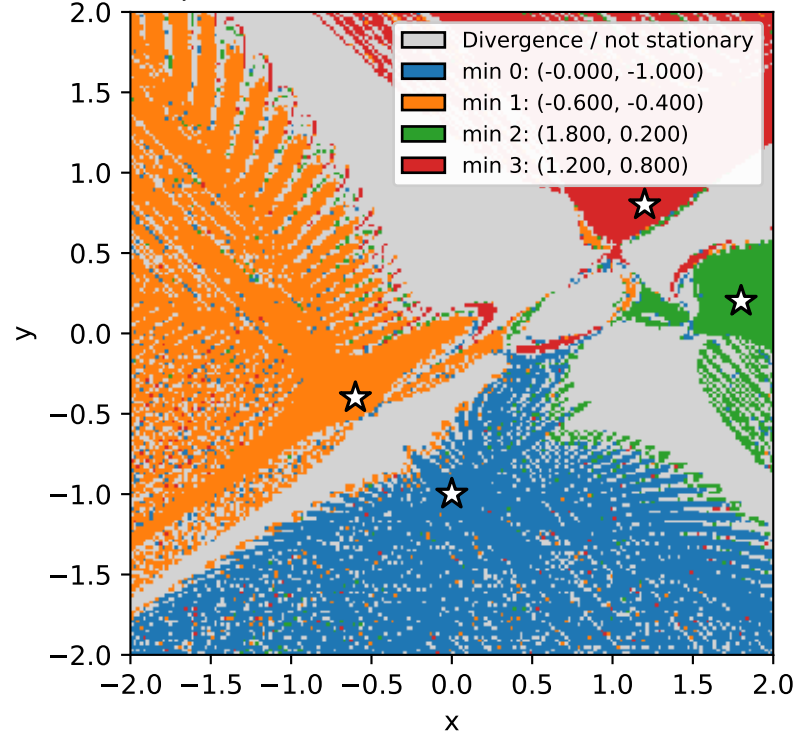 $\phi(f) = f^r$ ,  $f = \text{Goldstein - Price}$ ,  $r = 0.9$ 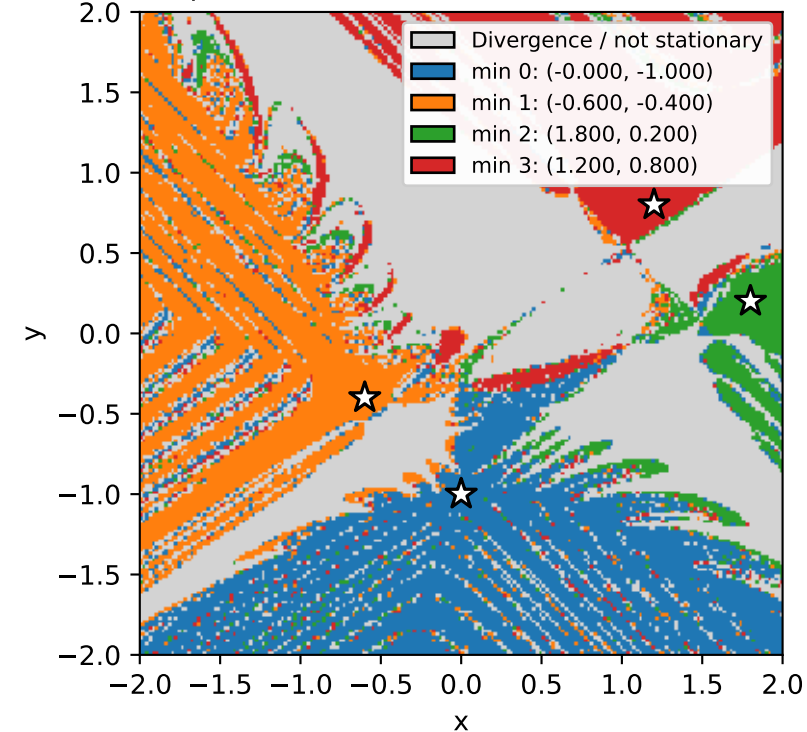

Supplement: supplementary_material [file Convergence_region_polynomial.pdf › Newton_Method_Composite_Loss/Convergence_region_polynomial.pdf]
