# Supplementary material
Source: ML conference proceedings conference paper supplement (https://openreview.net/forum?id=P8bnbHuMMv)

Rosenbrock (a=0.1)

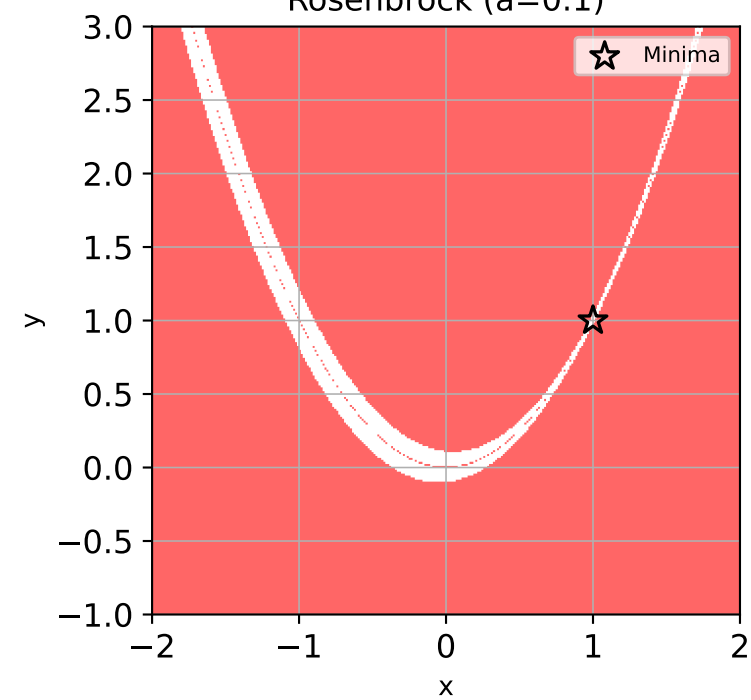

Rosenbrock (a=1)

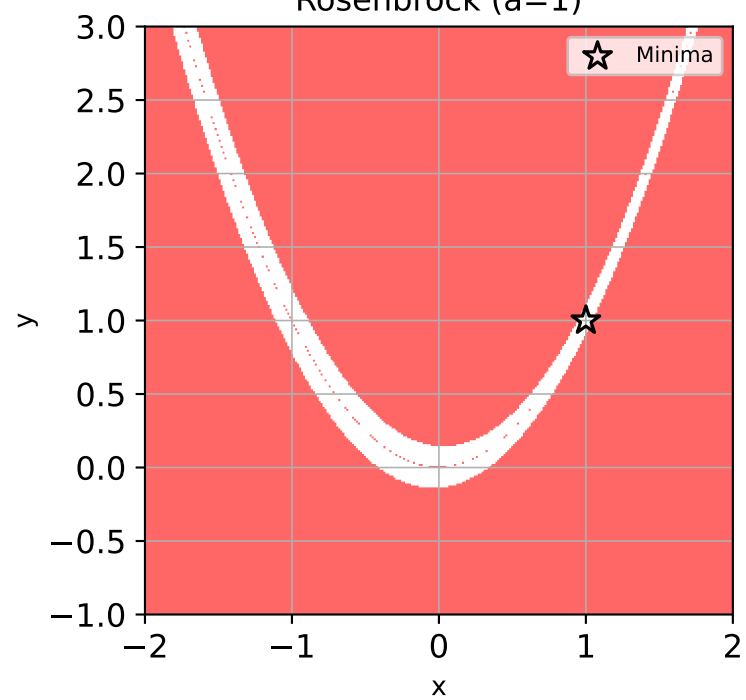

Rosenbrock (a=10)

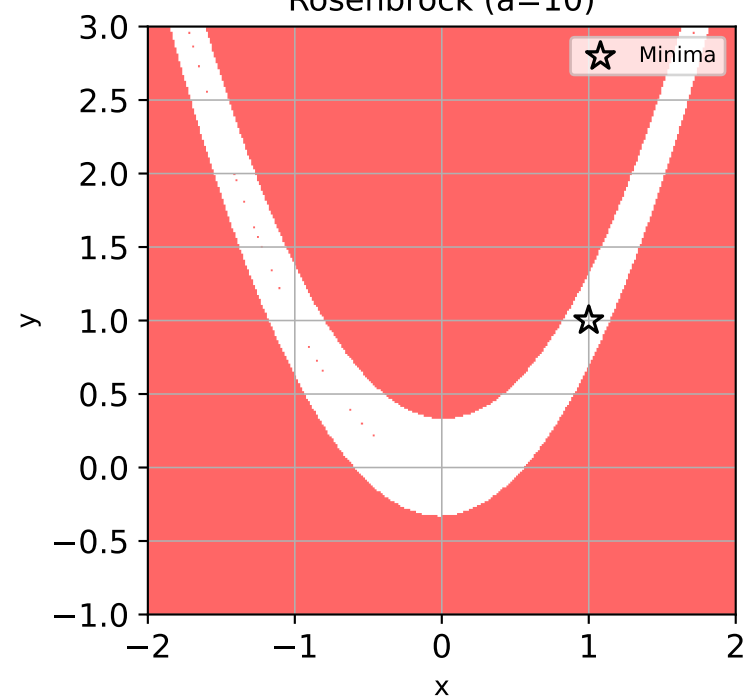

Rosenbrock (a=100)

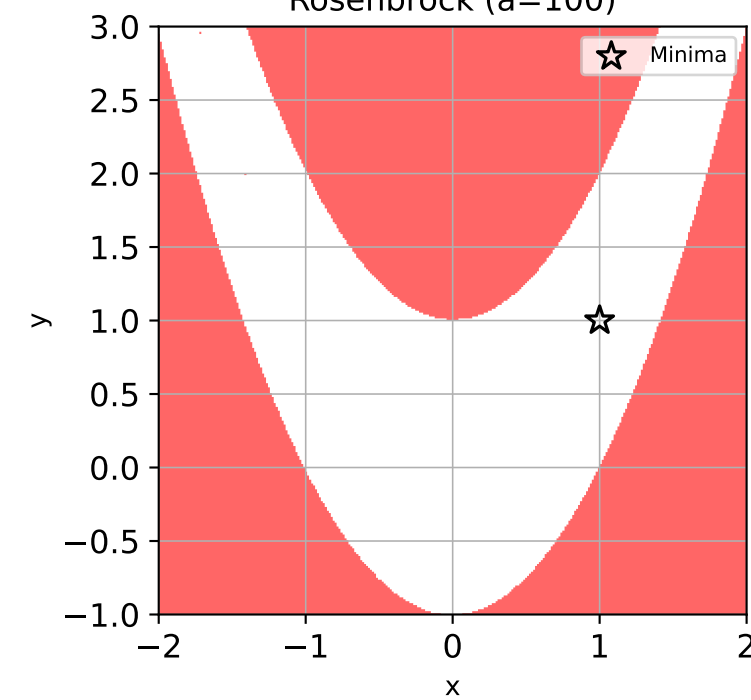

Beale (a=0.1)

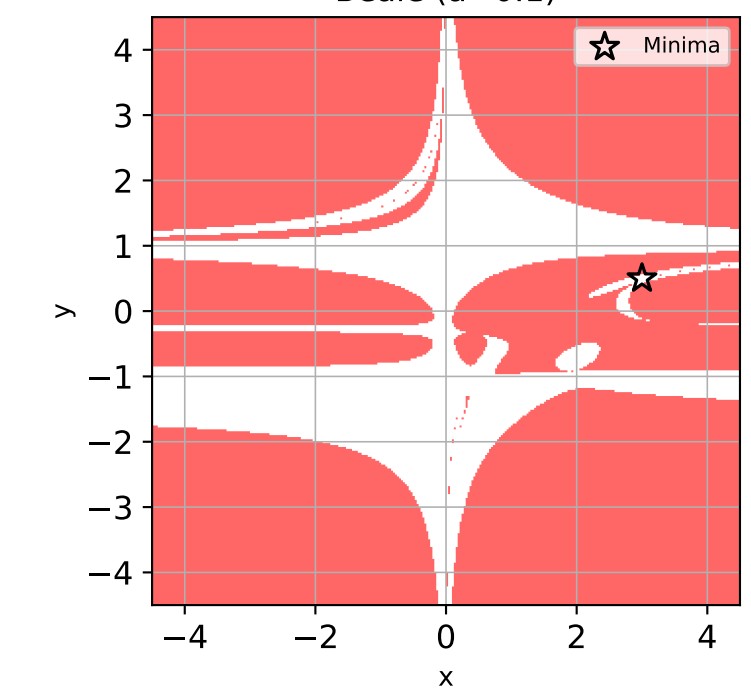

Beale (a=1)

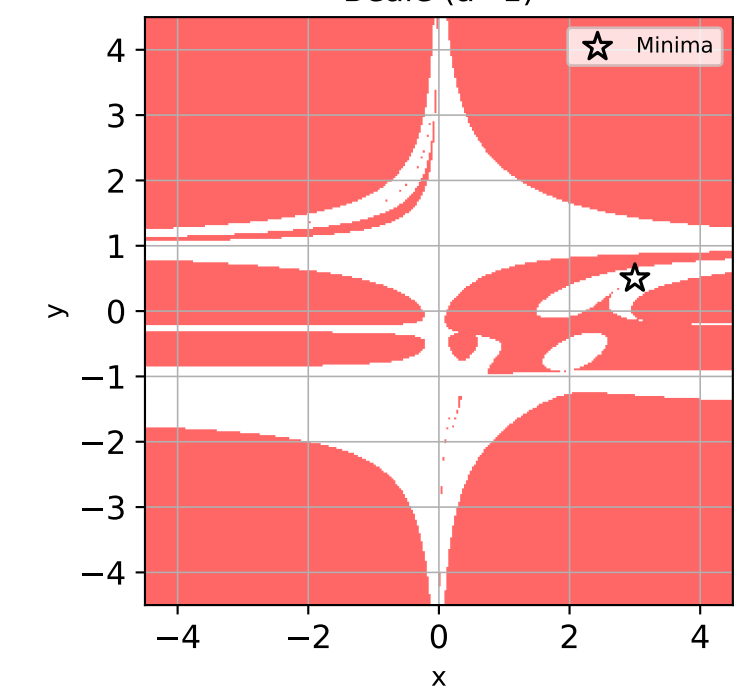

Beale (a=10)

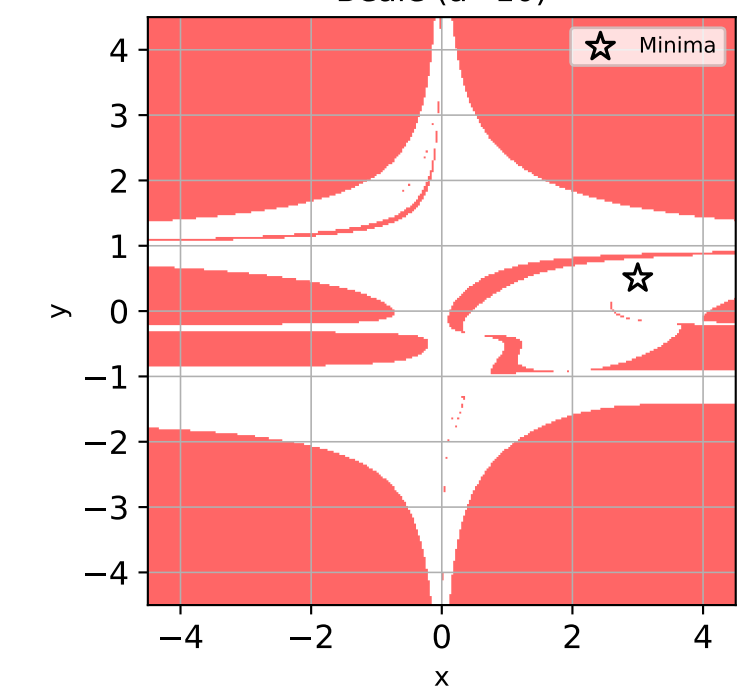

Beale (a=100)

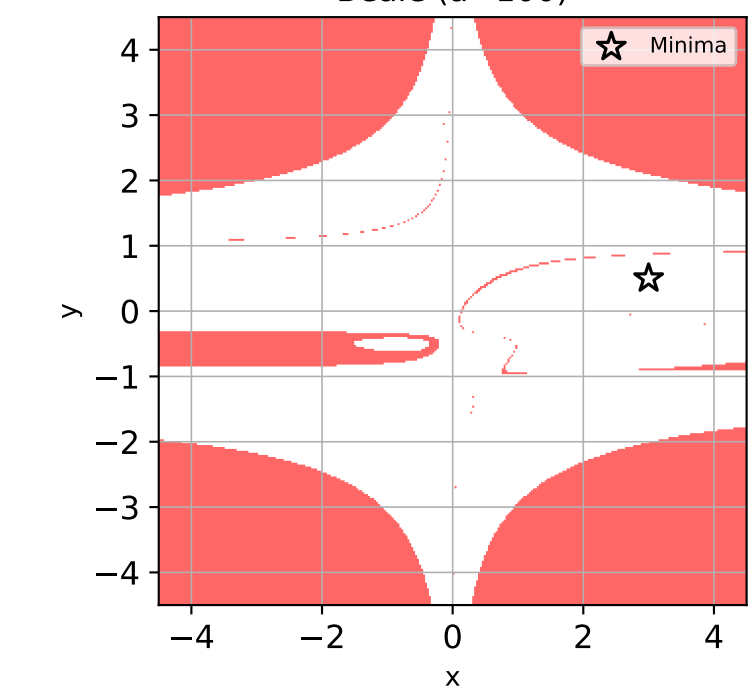

Goldstein-Price (a=0.1)

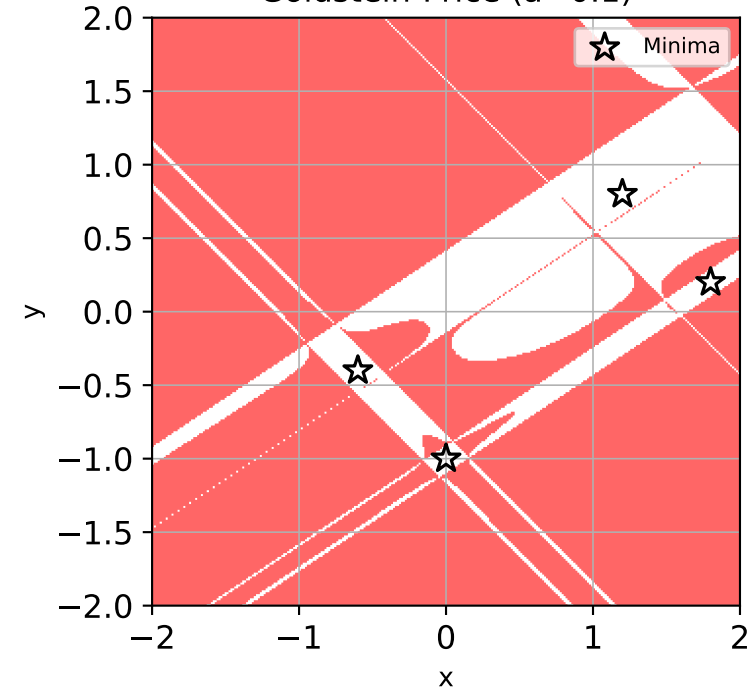

Goldstein-Price (a=1)

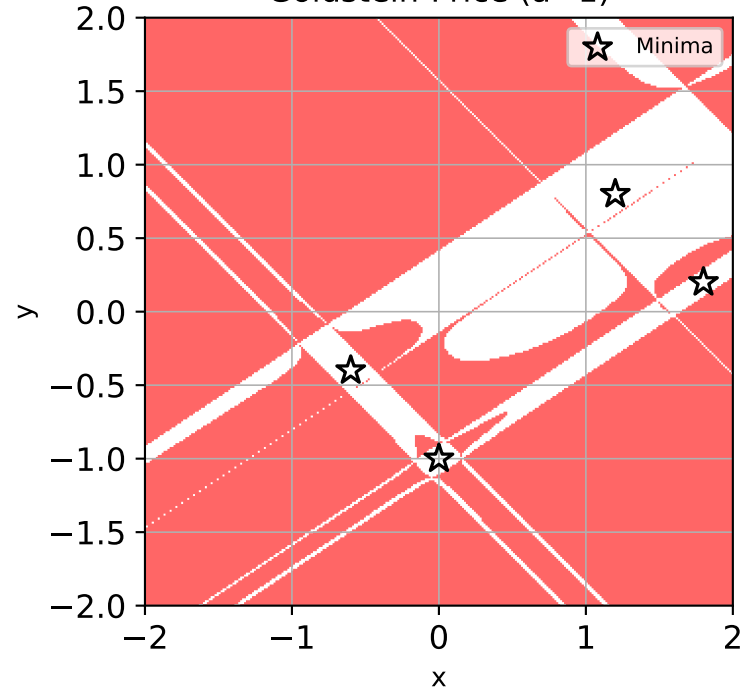

Goldstein-Price (a=10)

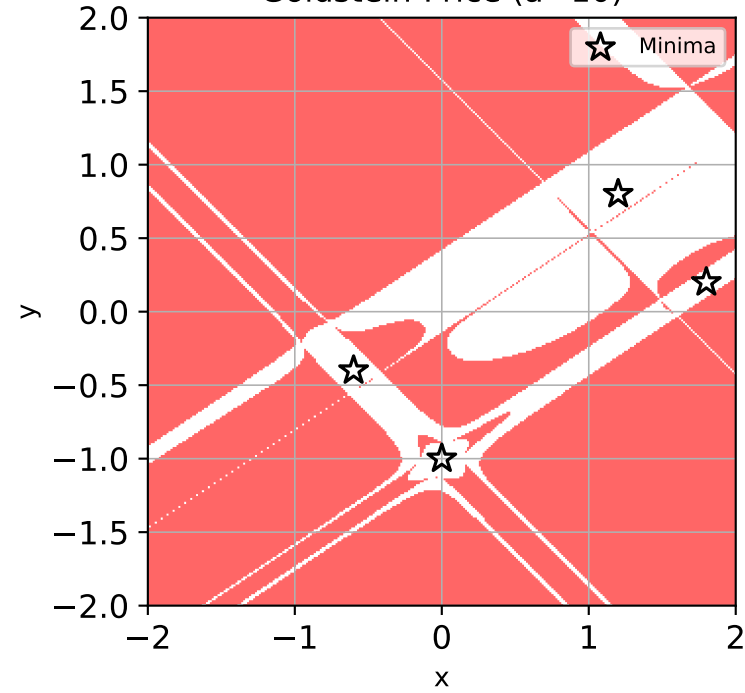

Goldstein-Price (a=100)

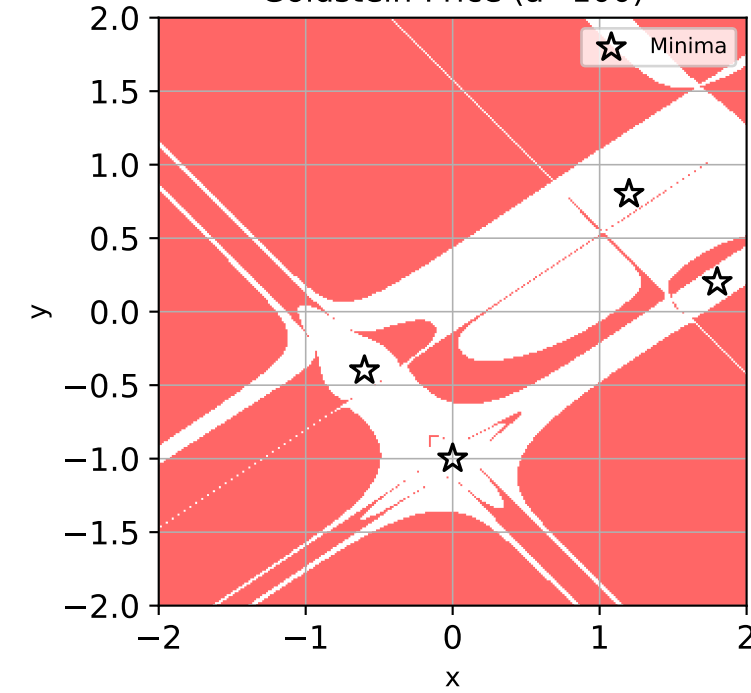

Supplement: supplementary_material [file flip_regions_log_grid.pdf › Newton_Method_Composite_Loss/flip_regions_log_grid.pdf]
