# Supplementary material
Source: ML conference proceedings conference paper supplement (https://openreview.net/forum?id=P8bnbHuMMv)

Rosenbrock (r=0.1)

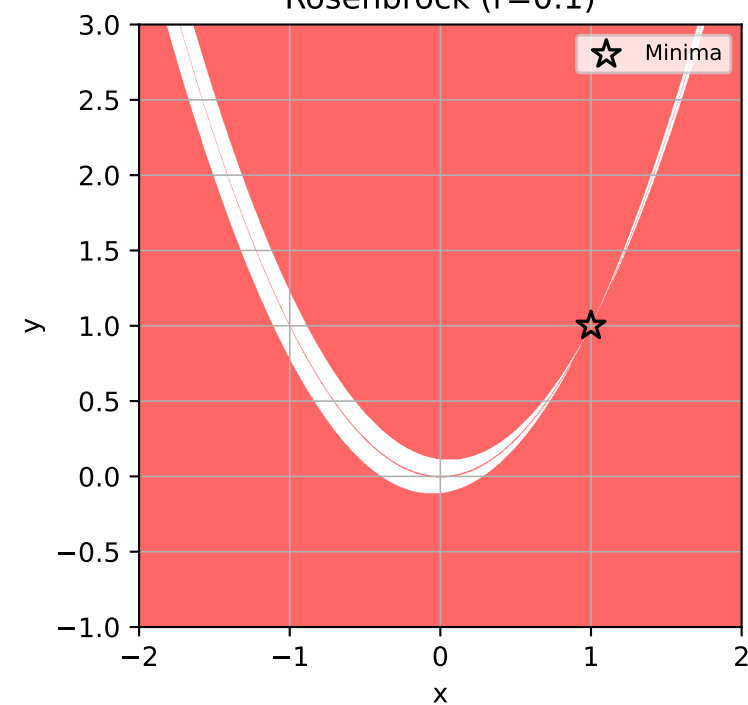

Rosenbrock (r=0.5)

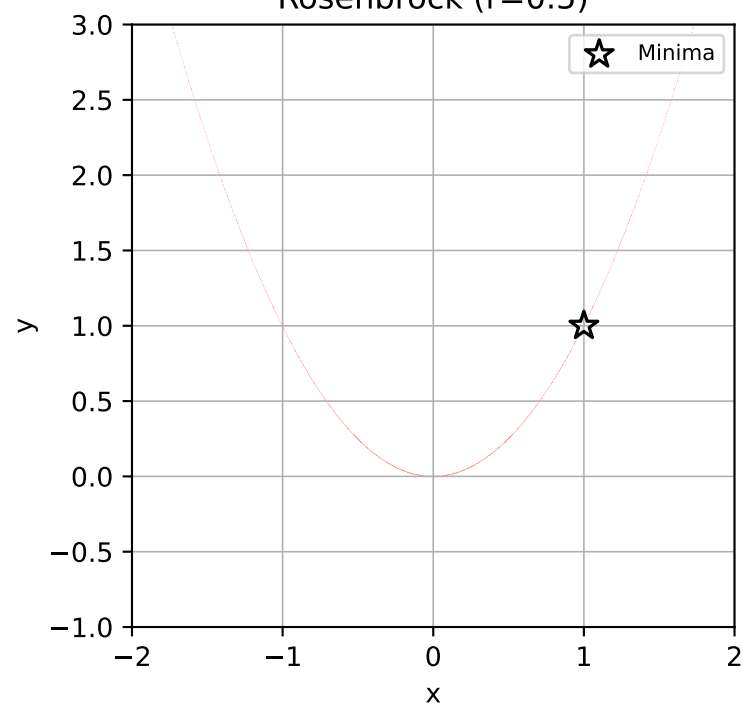

Rosenbrock (r=2)

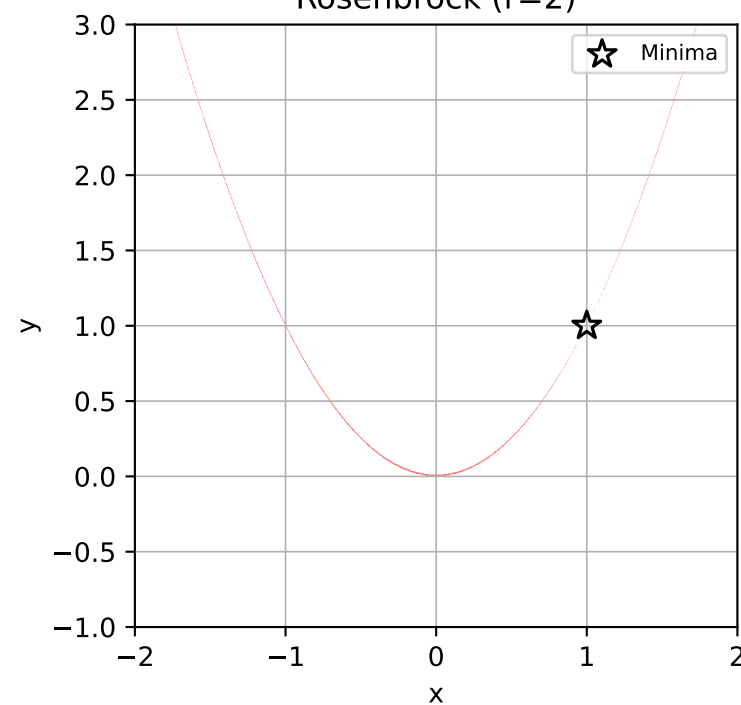

Rosenbrock (r=10)

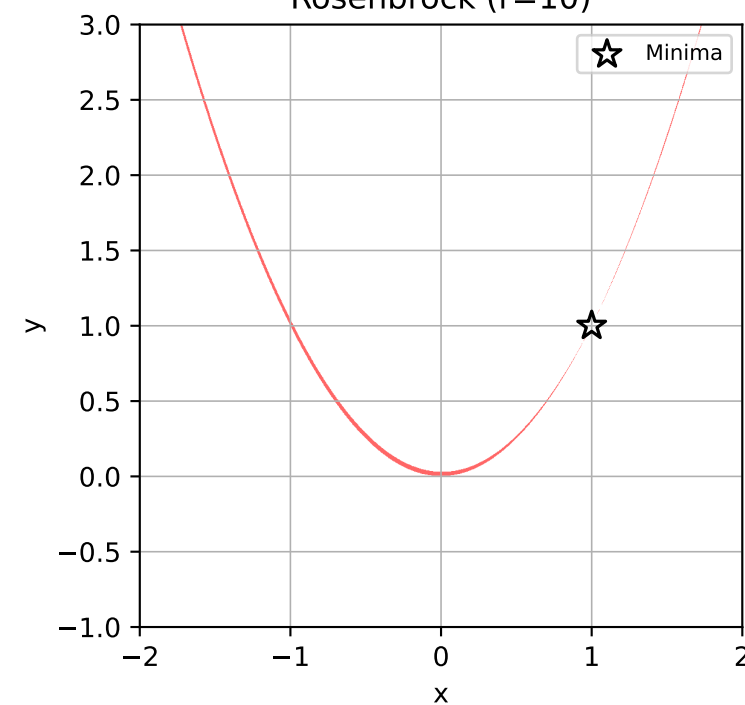

Beale (r=0.1)

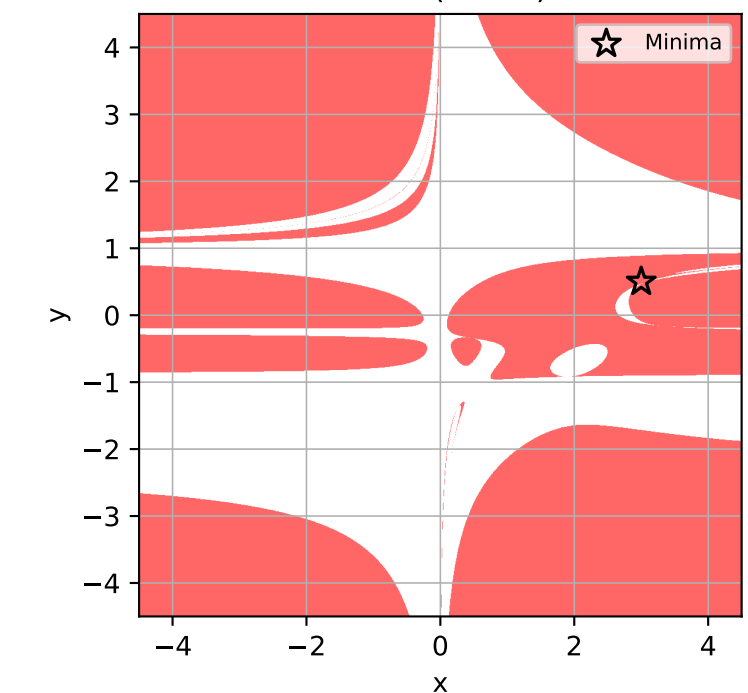

Beale (r=0.5)

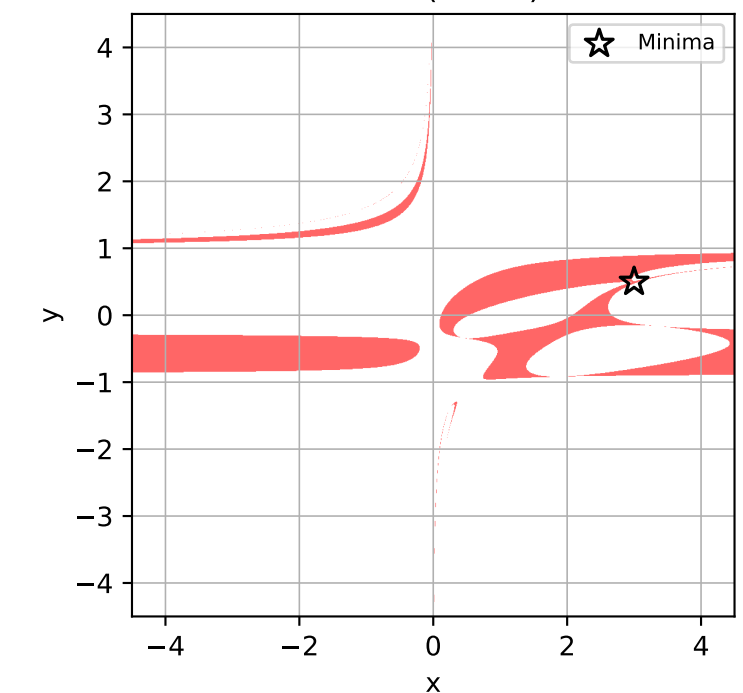

Beale (r=2)

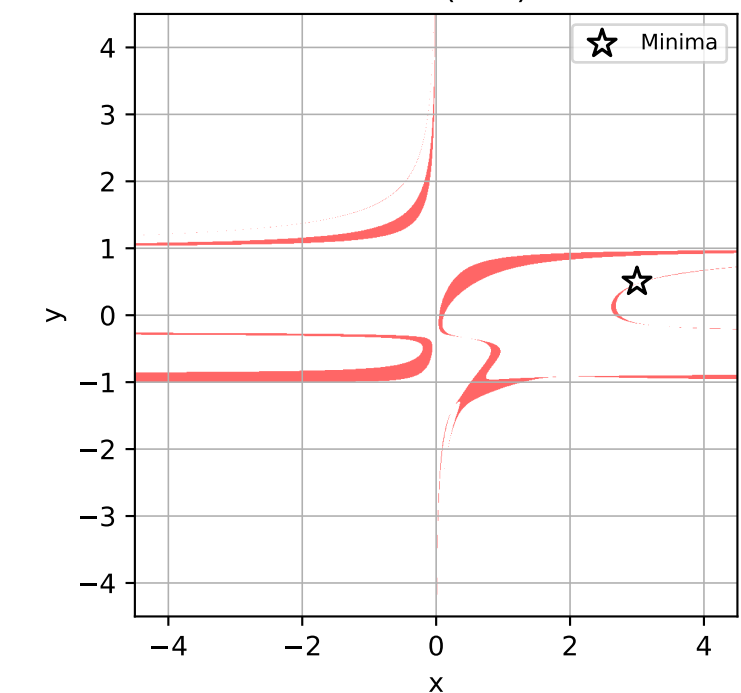

Beale (r=10)

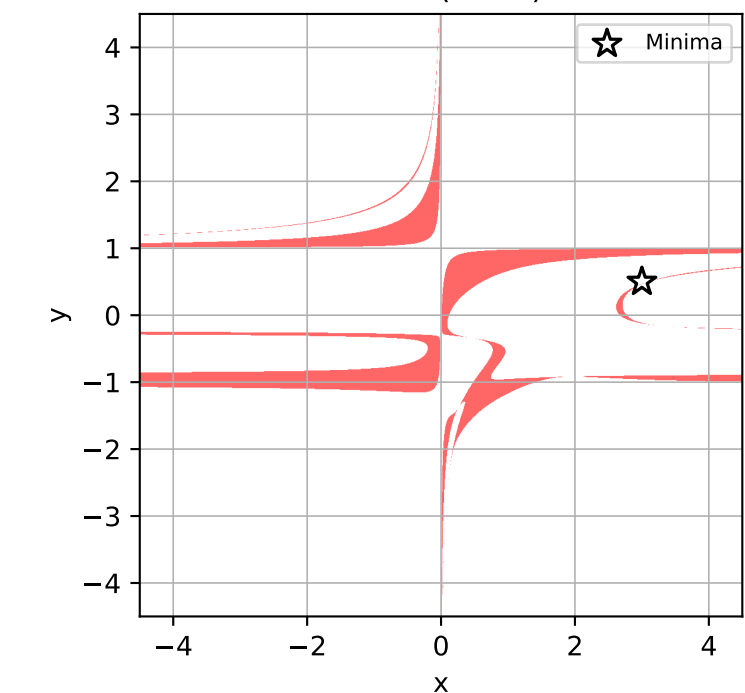

Goldstein-Price (r=0.1)

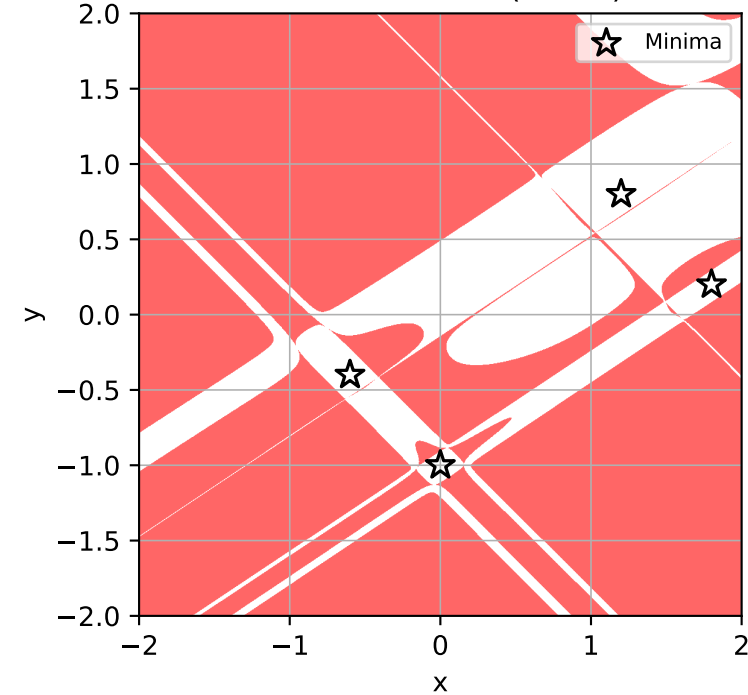

Goldstein-Price (r=0.5)

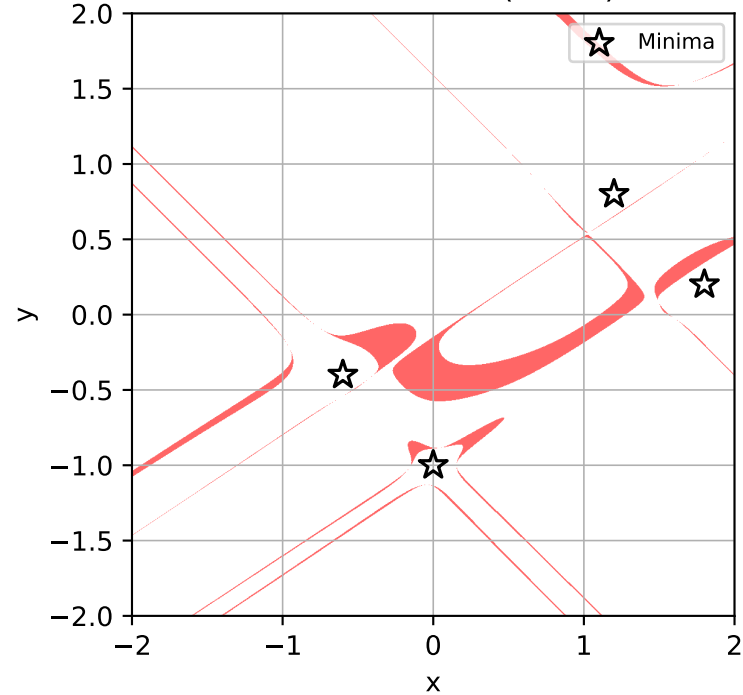

Goldstein-Price (r=2)

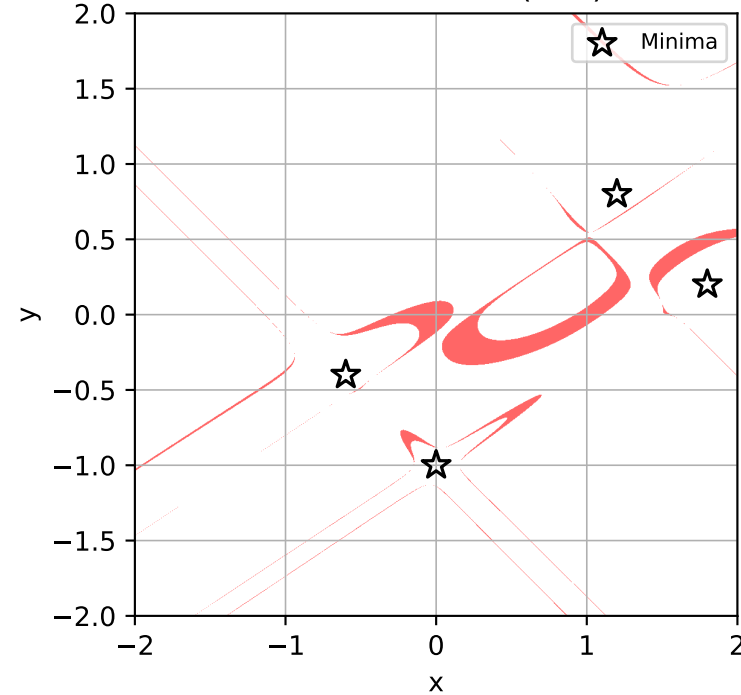

Goldstein-Price (r=10)

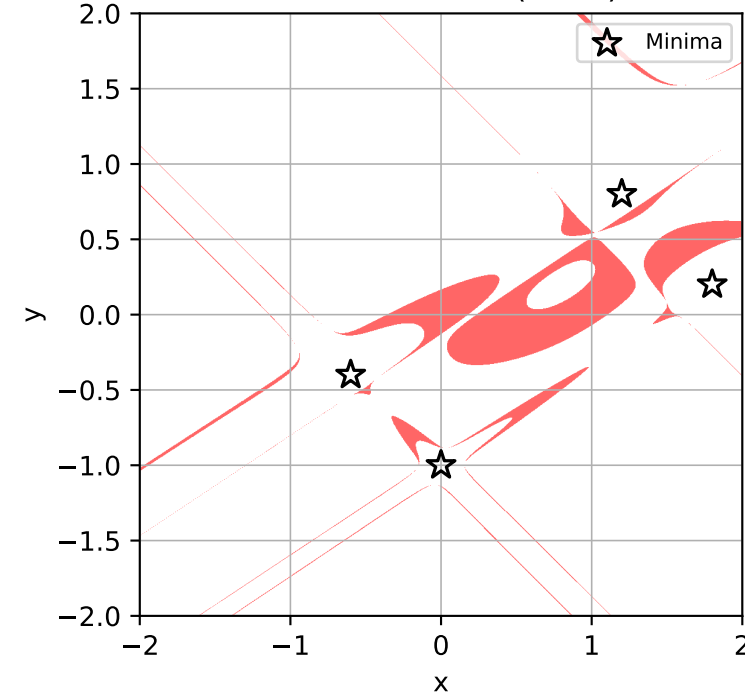

Supplement: supplementary_material [file flip_regions_polynomial.pdf › Newton_Method_Composite_Loss/flip_regions_polynomial.pdf]
