# Supplementary material
Source: ML conference proceedings conference paper supplement (https://openreview.net/forum?id=P8bnbHuMMv)

Unit-step Newton on  $f(x) = \ln(1 + x^2)$ 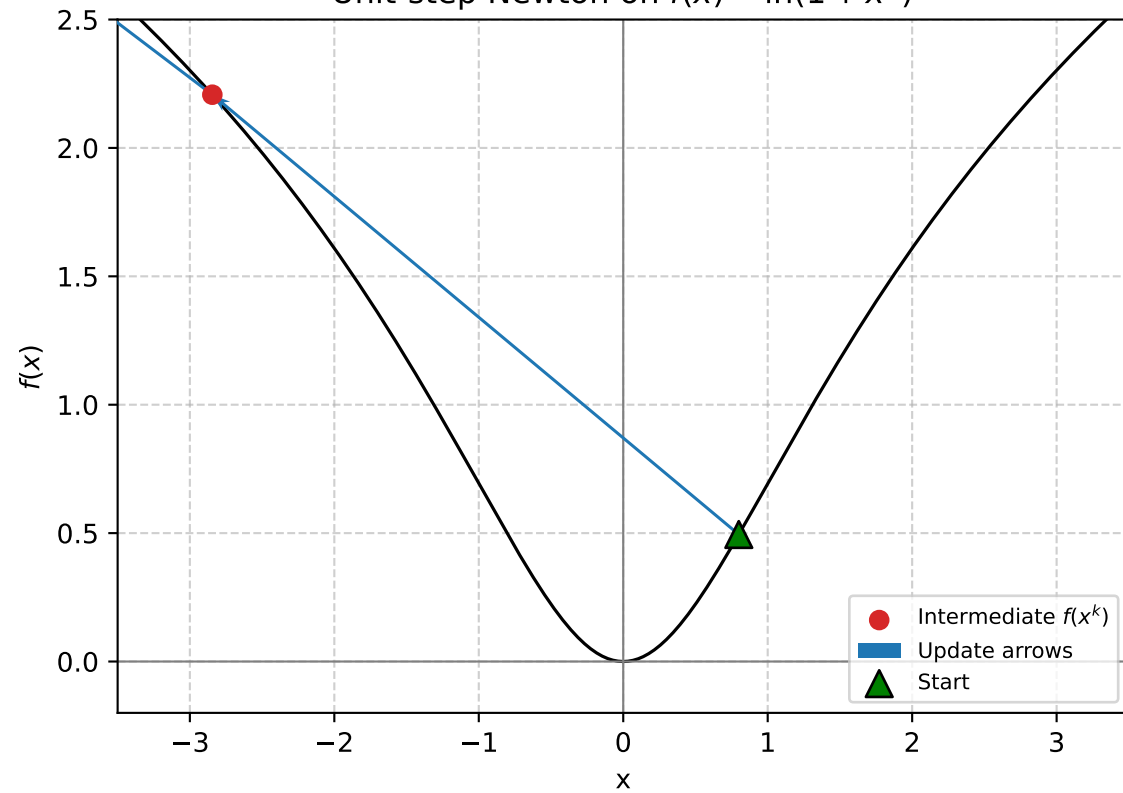Unit-step Newton on  $L(x) = 2x \arctan x$ 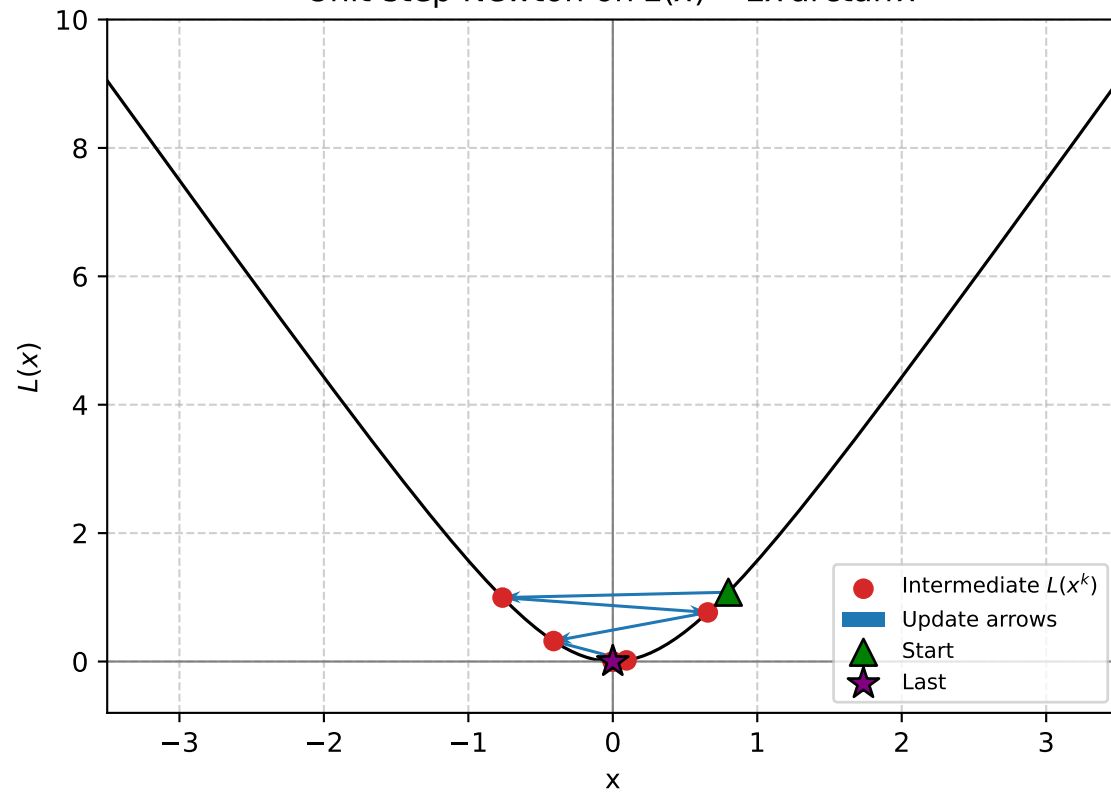Transformation-induced stepsizes for Newton on  $f(x) = \ln(1 + x^2)$ 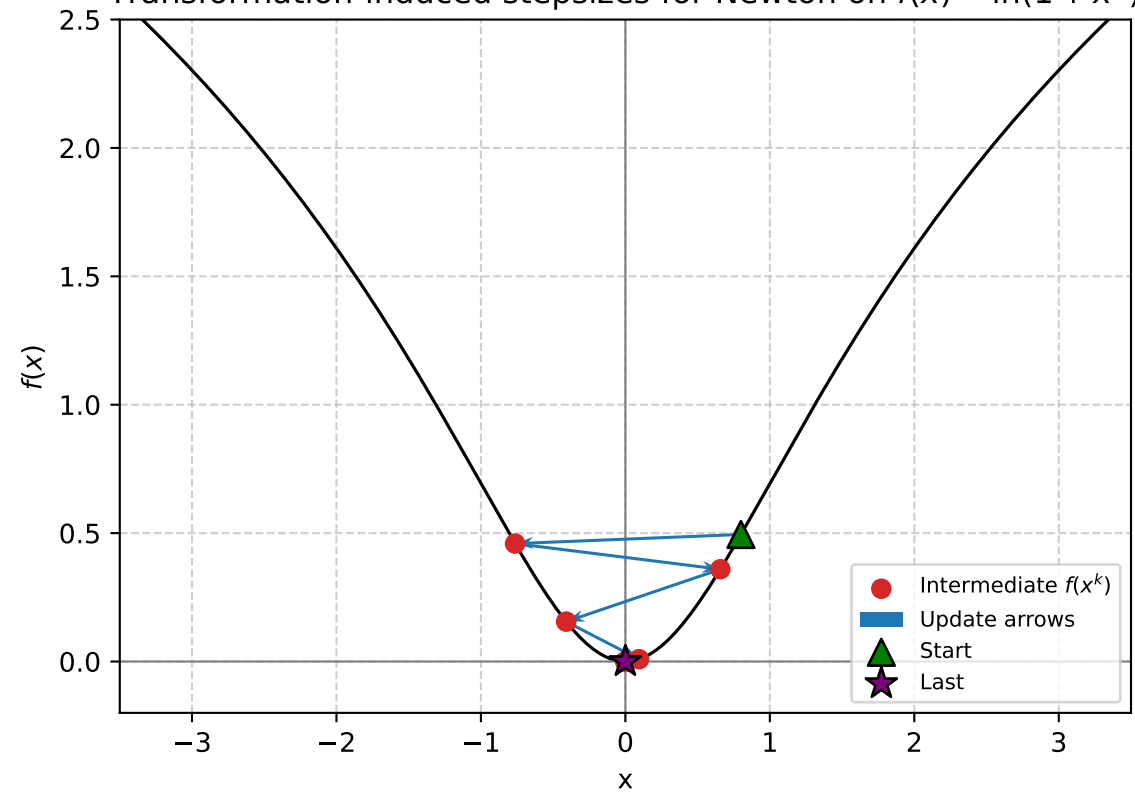

Supplement: supplementary_material [file newton_trajectories.pdf › Newton_Method_Composite_Loss/newton_trajectories.pdf]
